# Supplementary material for: On-road vehicle emission measurements show a significant reduction of black carbon and nitrogen oxides emissions in Euro6c and 6d diesel-powered cars
Source: Copernicus journal article supplement (doi:10.5194/egusphere-2024-3553), 2025-02-10
Supplement: Supplementary file [file egusphere-2024-3553-AC2-supplement.pdf]

# On-road vehicle emission measurements show a significant reduction of black carbon and nitrogen oxides emissions in Euro6c and 6d diesel-powered cars.

Irena Ježek Brečelj<sup>1</sup>, Asta Gregorič<sup>1,2</sup>, Lucijan Zgonik<sup>3</sup>, Tjaša Rutar<sup>3</sup>, Matic Ivančič<sup>1</sup>, Balint Alföldy<sup>1</sup>,  
5 Griša Močnik<sup>2,3</sup>, Martin Rigler<sup>1</sup>

<sup>1</sup>Aerosol d.o.o, Ljubljana, 1000, Slovenia

<sup>2</sup>Center for Atmospheric Research, University of Nova Gorica, Ajdovščina, 5270, Slovenia

<sup>3</sup>School for Environmental Sciences, University of Nova Gorica, 5271, Vipava, Slovenia

*Correspondence to:* Irena Ježek Brečelj (ibrecelj@aerosolmageesci.com)

10 **Abstract.** This study compares the results of three on-road chasing campaigns conducted in 2011, 2017, and 2023 to assess  
the direct impact of control technologies and the indirect effect of the regulations on the real-world on-road emissions of diesel-  
and gasoline-powered vehicles. The findings from these campaigns are consistent, highlighting the effectiveness of installed  
Diesel Particulate Filters (DPF) in reducing black carbon (BC) emission factors (EF) of diesel-powered cars by 88% compared  
to pre-DPF Euro 4 diesel-powered cars. These reduce the diesel car EF to those at the level of gasoline-powered cars, as  
15 intended with the legislation. The results demonstrate the success of Real Driving Emissions (RDE) regulations in lowering  
nitrogen oxide (NO<sub>x</sub>) emissions by 86% compared to pre-RDE Euro 6b, using technologies that were previously existing but  
underutilized. By presenting evidence of policy effectiveness through real-world results, we aim to support both scientific  
understanding and public trust in emission regulation. Using the Lorenz curves to evaluate super emitters' contribution to total  
emissions, we found that over the decade, the curves became more skewed for BC emissions, with 10% of diesel cars with the  
20 highest BC EF contributing 36%, 51%, and 65% of total diesel cars' emissions in 2011, 2017, and 2023 respectively. For NO<sub>x</sub>  
emissions, the top 10% most polluting diesel-powered cars contributed 22%, 28%, and 29% of total NO<sub>x</sub> emissions in the same  
years. Despite the inherent variability of the method, the results are consistent over the three campaigns and align well with  
broader policy changes, thus proving that the independent chasing method is a valuable screening tool for identifying super-  
emitters and serves as an effective monitoring tool for the entire vehicle fleet.

## 25 1. Introduction

Traffic contributes significantly to air pollution, compelling regulatory bodies to enact measures to reduce vehicle emissions.  
In the European Union (EU), regulations, such as 459/2012/EC (The European Commission, 2012) and 2016/646/EU (The  
European Commission, 2016), passenger cars and light commercial vehicles, mandate compliance standards for all new  
vehicles. Over the years, the progressive tightening of European emission standards corresponds with the mandatory  
30 implementation of exhaust after-treatment systems in vehicles. The Euro standards, which started with Euro 1 in 1992, first

mandated the use of catalytic converters to meet initial carbon monoxide limits. Further reduction of nitrogen oxides (NO<sub>x</sub>) emissions with Euro 3 (in 2000) necessitated the wider adoption of technologies like exhaust gas recirculation. More advanced systems like diesel particle filters (DPF) and selective catalytic reduction (SCR) became increasingly essential with the introduction of Euro 5 (in 2009) and Euro 6 (in 2014) standards, respectively (like goods vehicles standards denoted by Roman numerals Euro V and Euro VI). A more detailed description of progressive technological advances with respective Euro standards and associated costs can be found in Posada Sanchez et al. (2012).

In 2015, the “dieselgate” scandal shed light on critical issues within European legislation. The scandal underscored the discrepancy between emissions observed in laboratory tests, using the New European Driving Cycle (NEDC) (Economic Commission for Europe of the United Nations, 2011) – the cycle used for all new type-approved vehicles, and emissions encountered during everyday driving conditions. The cycle-beating controversy was particularly concerning, wherein vehicle manufacturers manipulated engine performance to regulate emissions solely for regulatory tests. Employing so-called defeat devices, these manufacturers optimized engine control systems to recognize testing conditions and automatically switch to a mode optimized for emissions compliance. The manufacturers defended the use of defeat devices as a measure to prevent clogging and aging. However, the Court of Justice of the European Union ruling in case C-693/18 ruled that “only immediate risks of damage which create a specific hazard when the vehicle is driven... justify the use of a defeat device” (Court of Justice of the European Union, 2020).

In the wake of the dieselgate scandal, the EU and its member states have recalled 8.5 million cars in the Union. This initiative was aimed at repairing the affected vehicles. The rate of repair reported by the Volkswagen group reached 79.7% by July 2018, and they offered technical service for the affected vehicles free of charge by the end of 2020. However, Volkswagen would not offer a full and clear guarantee against potential problems post-repair (Consumer rights and complaints - Coordinated actions - Dieselgate, 2024).

The ensuing scrutiny prompted regulatory reforms, notably the introduction of the Euro 6c standard (2018), which incorporated a more realistic driving cycle – the Worldwide-harmonized Light-duty Test Cycle (WLTC) (The European Commission, 2017) and mandated the use of a portable emissions measurement system (PEMS) in real driving emissions (RDE) tests alongside laboratory tests in conformity assessments.

Nevertheless, the response from authorities seems insufficient. Many of the inadequate vehicles, now between 9 to 14 years old, are still in use. An analysis by the International Council on Clean Transport (ICCT) involved 1,400 tests on Euro 5 and Euro 6 diesel cars made before RDE testing was implemented (Meyer et al., 2023). This study was carried out under controlled conditions by government bodies and revealed worrisome findings: “suspicious” NO<sub>x</sub> emission levels were detected in 77% to 100% of tests and vehicles tested, while “extreme” NO<sub>x</sub> emissions occurred in 40% to 75% of cases. These results respectively suggest the likely and almost certain use of prohibited defeat devices in Euro 5 and pre-RDE Euro 6 diesel cars.

The study by Giechaskiel et al. (2022) confirmed that expert tampering is still possible for vehicles that comply with current Euro standards, leading to extreme increases in emissions. They showed that tampered passenger cars' NO<sub>x</sub> and particle number emissions were ten times higher than those during a regeneration event.

65 Adopting new exhaust after-treatment technologies brings additional production and maintenance expenses. In 2012, the cost  
for a complete exhaust after-treatment system compliant with Euro 6 standards for light-duty diesel vehicles was estimated  
between €1,300 and €1,750 (Posada Sanchez et al., 2012). One basic maintenance requirement for systems using SCR is  
refilling the diesel emission fluid, commonly known as AdBlue. The cost of refilling the fluid varies depending on the vehicle,  
its use, driving style, etc., for a heavy goods vehicle, it can add up to €2,700 annually. The system also includes several sensors,  
70 which can trigger dashboard warnings and initiate a countdown to engine shutdown if issues arise. To circumvent the  
maintenance costs, some have turned to using AdBlue emulators. These devices bypass the SCR system by sending false  
signals to the emission controls, suggesting that the system is functioning correctly and preventing the vehicle from entering  
the limp mode, where the vehicle's speed is reduced and less important parts like air-conditioning are switched off (Ellermann  
et al., 2018). In a report to the Danish Road Traffic Authority (Janssen and Hagberg, 2018), the chasing method was tested  
75 against PEMS and was suggested as a possible screening tool to find emission noncompliant heavy-duty vehicles.  
In this context, on-road vehicle emission measurements serve as a critical tool not only for assessing compliance but also for  
driving policy discussions and fostering transparency within the automotive industry.  
This paper seeks to explore the implications of on-road emissions measurements on diesel-powered cars, with a focus on the  
significant reductions achieved in BC and NO<sub>x</sub> emissions. Although BC is not regulated as an exhaust pollutant, it represents  
80 48% of the emitted particle mass (Landis et al., 2007), is a strong climate forcer, and has well-documented health impacts  
(Bond et al., 2013; Janssen et al., 2012). Traffic emissions are the second-largest contributor to BC emissions (González Ortiz  
et al., 2020). The inclusion of BC in the new EU Clean Air Directive 2024/2881 (The European Parliament, 2024) further  
highlights the need for robust real-world data. Our findings help fill this gap.  
The on-road chasing method has thus far been extensively used in China to monitor the effectiveness of the heavy goods  
85 vehicles' emissions (Wang et al., 2023, 2015, 2011, 2012; Yang et al., 2025, 2024; Zeng et al., 2024). Ježek et al. (2015a)  
reported the first BC emission factors (EF) for diesel cars in Europe. In this study, we updated the BC EF for diesel-powered  
cars with previously unpublished Euro 5b-6d standards. Through a comprehensive analysis of three on-road vehicle-chasing  
campaigns, we aim to elucidate the effectiveness of regulatory measures, the role of independent monitoring, and the prospects  
for advancing toward cleaner and more sustainable transportation systems. Three on-road chasing measurement campaigns  
90 were conducted in the decade when exhaust aftertreatment system devices such as DPF and SCR were made mandatory for  
diesel-powered vehicles, capturing the dieselgate scandal and the effects of more stringent testing with PEMS and RDE for  
type approvals. The results of the three campaigns show a decreasing trend in vehicle BC and NO<sub>x</sub> EF. Categorizing vehicles  
by their respective vehicle emission standards, we show the effectiveness of the standards and the consistency of the chasing  
method results. We also calculate the contribution of super emitters and present them with Lorentz curves and Gini indices to  
95 compare the three campaigns.

## 2. Methods

Three on-road chasing campaigns were conducted in the 12 years in Slovenia (Europe). The first one was conducted in winter in December 2011, while the second and third campaigns were conducted in spring: March 2017 and May 2023. All three were carried out on regional roads and highways. The results of the 2011 campaign were published in Ježek et al. (2015a), while the results of the 2017 and 2023 campaigns were not published before.

**Table 1 Summary of average daily conditions as reported by the Slovenian Environmental Agency for Ljubljana Bežigrad station.**  
<https://meteo.arso.gov.si/met/sl/app/webmet/>.

| Campaign | Measurement period                                   | Average daily<br>T range (°C) | Daily avg. relative<br>humidity range | Avg. wind speed<br>(m/s) |
|----------|------------------------------------------------------|-------------------------------|---------------------------------------|--------------------------|
| 2023     | 3 <sup>rd</sup> May – 19 <sup>th</sup> May           | 11.9 – 18.1                   | 58 – 85%                              | 0.7 – 2.3                |
| 2017     | 13 <sup>th</sup> March – 23 <sup>rd</sup> March      | 6.3 – 14.0                    | 59 – 89%                              | 0.6 – 3.1                |
| 2011*    | 6 <sup>th</sup> December – 21 <sup>st</sup> December | -1.3 – 9.3                    | 76 – 94%                              | 0.6 – 1.7                |

\*Published in Ježek et al. (2015a).

The average daily weather conditions of each campaign are summarized in Table 1. Temperature, relative humidity, and wind speed at the Ljubljana measurement station as reported by the Slovenian Environmental Agency at the Ljubljana measurement station. The entire list of measurement dates and the weather conditions are collected in Supplement table 1.

We employed the same on-road chasing approach as was tested in Ježek et al. (2015b) and adopted in the 2011 campaign by Ježek et al. (2015a), where more details on the method are described and a comparison to other remote sensing campaigns was made. In short, with the on-road chasing measurements, the increase of pollutants over their background concentrations is determined by chasing a single vehicle on the road and then deducting the background concentrations obtained before and/or after the vehicle measurement. Assuming equal dilution of all released pollutants and complete combustion of fuel, in which practically all the carbon in the fuel is converted to CO<sub>2</sub> (Hansen and Rosen, 1990), the EF is then derived as the ratio of pollutant (P) to CO<sub>2</sub>, where CO<sub>2</sub> is then used to estimate the amount of fuel burned:

$$EF_P = \frac{\int_{t_i}^{t_j} (P_{t_j} - P_{t_i}) dt}{a \cdot \int_{t_i}^{t_j} (CO_{2\ t_j} - CO_{2\ t_i}) dt} \cdot w_c \quad , \quad (1)$$

Where the coefficient “a” in the denominator represents the mass ratio between C and CO<sub>2</sub>: a = 12:44 = 0.2727; thus, converting the mass concentration of CO<sub>2</sub> in Eq. (1) to units of mass concentration of C (mg C per m<sup>-3</sup>). The carbon fraction in fuel w<sub>c</sub> for both gasoline and diesel were set to 0.86 (Huss et al., 2013). The subscripts t<sub>i</sub> and t<sub>j</sub> denote the time of the beginning and end of the integration step, respectively. NO<sub>x</sub> was treated as NO<sub>2</sub> equivalent with a molar mass of 46 g mol<sup>-1</sup> (USEPA, 2010; Wang

et al., 2012). Ježek et al. (2015b) found about -24/+26 % variation on the calculated EF due to the determination of the pollutant background concentration, and the dilution did not affect the calculated BC EF. Excluding other carbonaceous species from the denominator was estimated to produce a bias smaller than 10% (Hansen and Rosen, 1990). More recent studies found <1 and 5% positive bias when excluding other carbonaceous species (Dallmann et al., 2011, 2012).

Our mobile platform was a car in which we installed an Aethalometer (model AE33, Aerosol Magee Scientific) to measure equivalent black carbon concentration (Petzold et al., 2013) (from here on expressed as BC), a NO<sub>x</sub> monitor (CLD 86 in 2017 and CLDAL2 in 2023, EcoPhysics), and a CO<sub>2</sub> monitor (GMP 343, Vaisala). The list of the used instruments, their time resolution, and measurement uncertainties are provided in Table 2. The instruments were powered by three 100 Ah batteries. The inlet was positioned on the right-hand side window of the mobile platform, isokinetic sampling was not attempted as it is not deemed necessary at the vehicle speeds (Wang et al., 2011). The AE33 was equipped with a PM2.5 cyclone as a size-selective inlet.

**Table 2 The list of instruments used in the 2017 and 2023 campaigns, their time resolutions, sampling flows, and measurement uncertainties.**

| Instrumentation                              | Species measured | Time resolution | Instrument flow                  | Measurement sensitivity |
|----------------------------------------------|------------------|-----------------|----------------------------------|-------------------------|
| NDIR sensor Carbocap GMP343 (Vaisala)        | CO <sub>2</sub>  | 2 s             | 6 l/min (2017)<br>1 l/min (2023) | 3 ppm                   |
| Aethalometer AE33 (Aerosol Magee Scientific) | BC               | 1 s             | 5 l/min                          | 700 ng/m <sup>3</sup>   |
| CLD 86 (Eco Physics) (2017)                  | NO <sub>x</sub>  | 1 s             | 0.1 l/min                        | 1% of the               |
| AL2CLD (Eco Physics) (2023)                  | NO <sub>x</sub>  | 1 s             | 1 l/min                          | measurement value       |

During each chase, we recorded the vehicle license plate number of each chased vehicle and thus obtained more detailed vehicle information such as vehicle age, fuel type used, and vehicle type according to Directive 2001/116/EC (The Commission of the European Communities, 2001) from the registry of the Slovenian Ministry of Infrastructure and Spatial Planning. We disregarded the measurement of vehicles for which we could not get the registry information.

On average, the duration of each chase was around a minute and a half in both the 2017 and 2023 campaigns, while in 2011 it was two minutes and a half (Ježek et al., 2015a). We discarded any chase that was shorter than half a minute. The longest chase in 2017 was 13.4 min, and 4.5 min in 2023. The traveling speed was changing within each chasing episode. In 2011, most trucks' speed was between 80 and 90 km h<sup>-1</sup>, and for cars, it was between 100 and 130 km h<sup>-1</sup> (Ježek et al., 2015a). In 2017 and 2023, more measurements were made on regional roads or traveling through small towns, so the speed was lower, mostly between 50 and 90 km h<sup>-1</sup>.

### 3. Results

Our total fleet size was 406 and 256 vehicles in 2017 and 2023, respectively. We grouped vehicles into three major categories: Gasoline cars, Diesel cars, and Goods vehicles, as in Ježek et al. (2015a). The sample size for each group and vehicle type as determined by European directive 2001/116/EC (The Commission of the European Communities, 2001) are included in Table 3 along with the sample size of the 2011 campaign by Ježek et al. (2015a), where more details on which types of vehicles were included in each group can be found. The total sample size in the 2011 campaign reported by Ježek et al (2015a) was 139, however, in this analysis, we could only use the results of the vehicles with the registry information available, which was 118 total.

In the 2011 campaign, Ježek et al. (2015a) reported that their focus was to measure diesel cars, for which BC EF were not published yet. The 2017 and 2023 campaigns were intended to update the BC EF for diesel-powered cars with previously unpublished Euro 5b-6d standards, to monitor how the fleet emissions changed over the decade, and how effective the emission standards have been on BC and NO<sub>x</sub> emissions. We therefore analyzed the changes in the total EU and Slovenian fleet compositions regarding the trends in fuel used, engine size, and vehicle age over time, and compared them with our vehicle fleet to check that the captured fleet is a representative sample of the measured fleet. We found that the Slovenian fleet is a good representation of the European average fleet, as the size of both is increasing over time at the same rate, the share of diesel and gasoline-powered cars is approximately the same, and the engine size and car age groups are similar. The samples were representative of diesel and gasoline cars, but not as representative of goods vehicles, where our sample size was smaller.

The fleet analysis can be found in Supplement Information 1. In section 3.1 we present the general trends and improvements in EF distributions, comparing the results of gasoline cars, diesel cars, and goods vehicles from the three campaigns 2011, 2017, and 2023. We then break down the three main vehicle categories according to their vehicle emission standards in section 3.2 and explore the effectiveness of the implemented technology and legislation. In section 3.3 we demonstrate how a small fraction of vehicles disproportionally contributes to total fleet emissions and how the Lorentz curves became more skewed over the three measurement campaigns.

**Table 3 Sample size in the 2023 and 2017 campaigns compared to the 2011 campaign by Ježek et al. 2015. Vehicle categories and their corresponding 2001/116/EC categories.**

| Category       | Vehicle type           | 2001/116/EC | 2023 | Category total 2023 | 2017 | Category total 2017 | 2011 (Ježek et al., 2015a) |
|----------------|------------------------|-------------|------|---------------------|------|---------------------|----------------------------|
| Gasoline cars  | Gasoline cars          | M1          | 101  | 103                 | 118  | 121                 | 24                         |
|                | Gasoline/LPG           | M1          | 1    |                     | 3    |                     |                            |
|                | Light goods vehicles 1 | N1          | 1    |                     | 0    |                     |                            |
| Diesel cars    | Diesel cars            | M1          | 90   | 122                 | 129  | 170                 | 66                         |
|                | Light goods vehicles 1 | N1          | 32   |                     | 41   |                     |                            |
| Goods vehicles | Light goods vehicles 2 | N2          | 2    | 31                  | 53   | 113                 | 28                         |

|              |                      |    |            |  |            |  |            |
|--------------|----------------------|----|------------|--|------------|--|------------|
|              | Buses                | M3 | 6          |  | 15         |  |            |
|              | Minibus              | M2 | 1          |  | 0          |  |            |
|              | Heavy goods vehicles | N3 | 22         |  | 45         |  |            |
| <b>TOTAL</b> |                      |    | <b>256</b> |  | <b>404</b> |  | <b>118</b> |

**3.1. Trends and Improvements in Emission Factor Distributions - Comparative Analysis of Gasoline Cars, Diesel Cars, and Goods Vehicles (2011-2023)**

The trends of BC and NO<sub>x</sub> EF over the three measurement campaigns for the three main vehicle groups—gasoline cars, diesel cars, and goods vehicles are presented in Figure 1. This figure shows the EF distributions for each vehicle group across the three campaigns using box-and-whisker plots, including the minimum and maximum values.

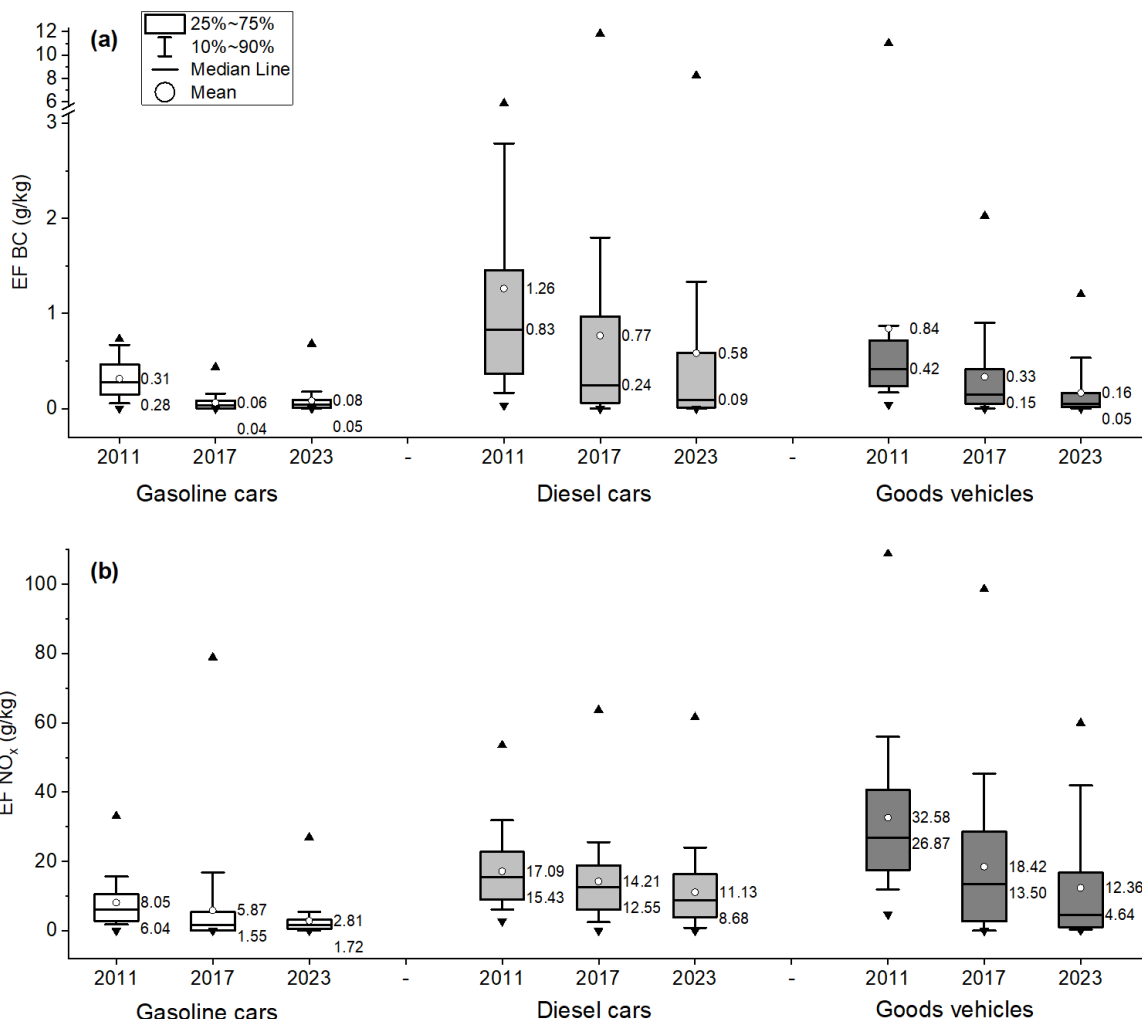

**Figure 1** Box-and-whisker plot for (a) BC EF (b) NO<sub>x</sub> EF of Gasoline cars, Diesel cars, and Goods vehicles in the three on-road measurement campaigns conducted in 2011 (Ježek et al. 2015), 2017, and 2023. The black triangles represent the group's minimum and maximum EF measured in the respective campaign. The numbers on the right of the box plot are the median values. Note the scale break for BC EF.

Gasoline-powered cars exhibit the lowest BC and NO<sub>x</sub> EF distributions among the three vehicle categories (median BC EF values are 0.28, 0.04, and 0.05 g kg<sup>-1</sup> for 2011, 2017, and 2023 campaigns, respectively). In the 2011 campaign, gasoline-powered cars' BC and NO<sub>x</sub> EF were higher compared to those in the subsequent campaigns in 2017 and 2023. Gasoline-powered cars' maximum BC EF from the three campaigns were all in the range of the median diesel-powered cars in 2011 (0.83 g kg<sup>-1</sup>) or average 2023 (0.58 g kg<sup>-1</sup>), while the maximum NO<sub>x</sub> EFs (33.01 g kg<sup>-1</sup>, and 26.88 g kg<sup>-1</sup> in 2011 and 2023 respectively) were in the range of the 90<sup>th</sup> percentile of diesel-powered cars (or higher like in 2017 when it was 78.83 g kg<sup>-1</sup>).



Diesel-powered cars show a consistent reduction in the average, median, and interquartile range of BC EF across the three campaigns: the median values decreased from 0.83 g kg<sup>-1</sup> in the 2011 campaign to 0.24 g kg<sup>-1</sup> and 0.09 g kg<sup>-1</sup> in 2017 and 2023 campaigns, respectively. This trend indicates significant progress in reducing particulate emissions from diesel-powered cars. However, the NO<sub>x</sub> EF for diesel-powered cars only shows a slight reduction from the 2011 to 2017 campaign (median 15.43 g kg<sup>-1</sup> and 12.55 g kg<sup>-1</sup>, respectively) and some improvement in 2023 (median 8.86 g kg<sup>-1</sup>). This suggests that while particulate emissions have been effectively addressed, NO<sub>x</sub> emissions from diesel-powered cars remain a challenge, albeit with some improvements. The high maximum BC EF values skew the distribution of diesel-powered cars, so the median and the average values don't show the same level of improvement in the group, whereas the NO<sub>x</sub> EF median and average are more aligned and show the same trend.

The BC EF distributions for goods vehicles generally feature slightly lower values than those of diesel cars within the same campaigns, and they exhibit a decreasing trend over time (median values in 2011, 2017, and 2023 campaigns were 0.42, 0.15, and 0.05 g kg<sup>-1</sup>, respectively). This indicates progress in reducing particulate emissions from goods vehicles with DPFs. The goods vehicles' NO<sub>x</sub> EF distribution values were higher than diesel-powered cars' NO<sub>x</sub> EF distribution in the 2011 campaign (median 26.9 g kg<sup>-1</sup>), similar in the 2017 campaign (median 13.5 g kg<sup>-1</sup>), and lower than diesel cars in the 2023 campaign (median 4.6 g kg<sup>-1</sup>). Therefore, goods vehicles showed a more significant improvement in NO<sub>x</sub> emissions over the three campaigns.

Overall, the EF for BC and NO<sub>x</sub> have generally decreased across all vehicle categories over the study period, reflecting advancements in vehicle technology and emissions control strategies. However, the varying reduction rates between BC and NO<sub>x</sub> EFs among the vehicle types highlight the ongoing challenges and areas for further improvement in emission reductions.

**3.2. Analysis by Vehicle Emission Standards.**

To investigate the influence of the vehicle emission standards we broke down each main vehicle category into smaller subgroups according to vehicle emission standards for all three campaigns. To describe the locality, spread, and skewness of each group's EF distribution, we used the median, the first and third quartiles. Since the EF distributions are not normal Gaussian and are not symmetrical, the median is a more robust parameter to describe the central tendency of a distribution than the mean. The large variability in the vehicles' EF is represented by the first and third quartiles. The skewness of the data may be seen in Figure 1, where in some cases the mean overlaps with the 75th percentile - i.e., BC EF for diesel cars and goods vehicles in 2023. Since we are not making any assumptions about the underlying statistics of the distribution, we are using the median, the first and third quartiles to describe the locality, spread, and skewness of each group's EF distribution. Figure 2 illustrates the comparison for each subgroup across the three campaigns.

Figure 2 shows that the results for each subgroup are consistent over the three campaigns. This consistency highlights the reliability of our measurements, and the trends observed in the total groups' EF distributions. The exceptions, as previously noted, are the gasoline cars in 2011 and the NO<sub>x</sub> EF of goods vehicles. The discrepancies observed for gasoline cars in the 2011 campaign are likely due to the smaller sample size. Different weather conditions may have influenced emissions, although

230

unlikely since Grange et al. (2019) did not show temperature dependency on gasoline cars NO<sub>x</sub> emissions. In the case of goods vehicles, the diverse range of vehicle types and the smaller sample size contribute to the variability in NO<sub>x</sub> emissions, making inconsistencies in these results less unexpected. The sample size of each subgroup is reported in Supplement table 2, and the median and interquartile ranges for BC and NO<sub>x</sub> EF are in Supplement tables 3a and 4a, respectively, while the averages for each subgroup are in Supplement tables 3b and 4b, respectively.

Overall, the consistency in the results over the three campaigns underscores the effectiveness of emission standards and the improvements in vehicle technologies to reduce emissions. This detailed breakdown by vehicle emission standards provides a clearer understanding of how specific groups have progressed over time.

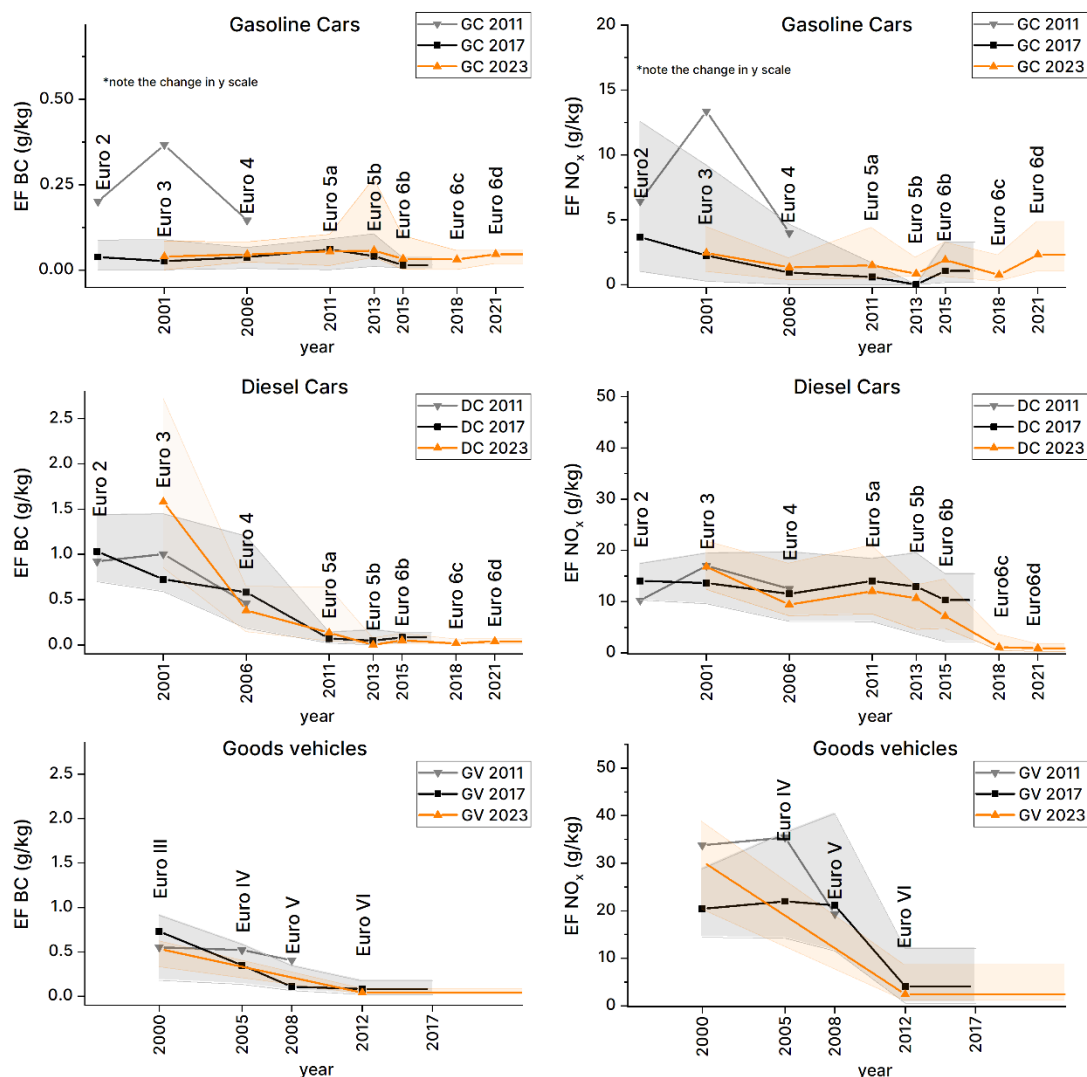

**Figure 2** Black carbon (left column) and NO<sub>x</sub> (right column) emission factors (EF) for the Gasoline cars (top row), Diesel cars (middle row), and Goods vehicles (bottom row). The points represented with grey inverted triangles, black squares, and orange triangles are the results for the 2011, 2017, and 2023 campaigns, respectively. They represent the median values for all vehicles that were registered after the point and 'belong to specific emission standard', the interpolated lines indicate the trend between two standards, and the shaded area is an interpolated interquartile range of the period.

A notable drop in BC EF was observed for diesel-powered cars and goods vehicles with the introduction of Euro 5 and Euro V standards, **88% and 73%** respectively. The reduction in both the median and interquartile range can be attributed to the mandatory implementation of DPF to meet the desired PM emission reductions set by these standards.

**The Euro 5a diesel-powered cars' median BC EF dropped** below the 25<sup>th</sup> percentile of Euro 4 in both the 2017 and 2023 campaigns. In the 2017 campaign, the Euro 5a median was 0.07 g kg<sup>-1</sup> and was much lower compared to the Euro 4 25<sup>th</sup> percentile of 0.18 g kg<sup>-1</sup>. In the 2023 campaign, both values were 0.13 g kg<sup>-1</sup>. With Euro 5b and later standards, the 75<sup>th</sup>

percentile of BC EF dropped below the 25<sup>th</sup> percentile of Euro 4 in both the 2017 and 2023 campaigns. These values are summarized in Supplement table 3a.

These reductions brought diesel-powered car BC EF in line with gasoline-powered car BC EF, reflecting the legislation that introduced PM emission limits for gasoline-powered cars with Euro 5a standard and set the same PM emission limit for both gasoline- and diesel-powered cars (0.005 g km<sup>-1</sup> for Euro 5a, 0.0045 g km<sup>-1</sup> for subsequent standards, see also Supplement figure 5).

Additionally, while the Euro VI standard managed to reduce the NO<sub>x</sub> EF of goods vehicles in 2012 through the availability of new technologies such as SCR, a notable drop in NO<sub>x</sub> EF of diesel-powered cars was only observed after the enforcement of more stringent type of approval tests with RDE under the Euro 6c and Euro 6d standards in 2018. Our Euro 6 diesel-powered cars' results match the results from the TRUE project (Bernard et al., 2021), which reports pre-RDE Euro 6 fuel-specific NO<sub>x</sub> emissions of around 7.5 g kg<sup>-1</sup> (we found Euro 6b EF 7.12 g kg<sup>-1</sup>) and Euro 6d around 2.0 g kg<sup>-1</sup> (in our work, Euro 6d was 0.9 g kg<sup>-1</sup>) by using the remote sensing method. Carslaw et al. (2019), who also used the remote sensing method, reported slightly higher diesel-powered cars' NO<sub>x</sub> EF, 9.1 g kg<sup>-1</sup> for Euro 6 and 17.2 g kg<sup>-1</sup> for Euro 5 in the United Kingdom. Compared to the averages of our fleet, we find that their results were similar or slightly higher. While measuring with different methods in a similar temperature range, we attribute the difference to the difference between the Slovenian and the United Kingdom fleets, which would be consistent with Chen et al. (2020), who showed that the United Kingdom fleet generally had higher NO<sub>x</sub> EF than Spain, Switzerland, and Sweden.

Our measurements showed that gasoline-powered cars' emissions were much lower compared to diesel-powered cars until the introduction of RDE tests. Before Euro 6b, the median NO<sub>x</sub> emissions for gasoline cars were 0-16% of their diesel counterparts. For Euro 6b, gasoline-powered cars' emissions were 9% (2017) and 27% (2023) of diesel car emissions. After Euro 6b, diesel cars had similar or lower median NO<sub>x</sub> emissions compared to gasoline cars.

While examining the impact of legislation on the measured fleet EF distribution, we observed that, although the median NO<sub>x</sub> EF values did not show substantial improvement, there was a consistent reduction in the 25<sup>th</sup> percentile. Additionally, some improvement was noted in the median values of Euro 6b vehicles following the recall, as evidenced when comparing trends from the 2017 and 2023 campaigns. However, the positive shift in EF distribution driven by lower-emission vehicles is offset by the persistence of high-polluting vehicles, particularly those at the 75<sup>th</sup> percentile, which exhibit no significant change. Despite the relative stability of median NO<sub>x</sub> EF values among pre-RDE diesel-powered cars, a reduction in emissions can still be observed through the lowering of the 25<sup>th</sup> percentile. To evaluate the reductions in diesel cars' NO<sub>x</sub> EF fleet measured in real driving conditions reflected the legislation at all, we compared our NO<sub>x</sub> EF distributions against legislative trends (Figure 3), plotting the median, 25<sup>th</sup>, and 75<sup>th</sup> percentiles of each campaign's subgroups against NO<sub>x</sub> standards from Euro 3 to Euro 6b. Euro 6c and d were excluded due to identical limits to Euro 6b but different testing methods (RDE). Linear regression and ANOVA analysis ( $\alpha = 5\%$ ) revealed that for diesel cars, the 2023 campaign showed a significant downward trend in median and 25<sup>th</sup> percentile values, while the 2017 campaign showed a significant downward trend only in 25<sup>th</sup> percentile values. For gasoline cars, only the 75<sup>th</sup> percentile values in the 2017 campaign showed a significant trend.

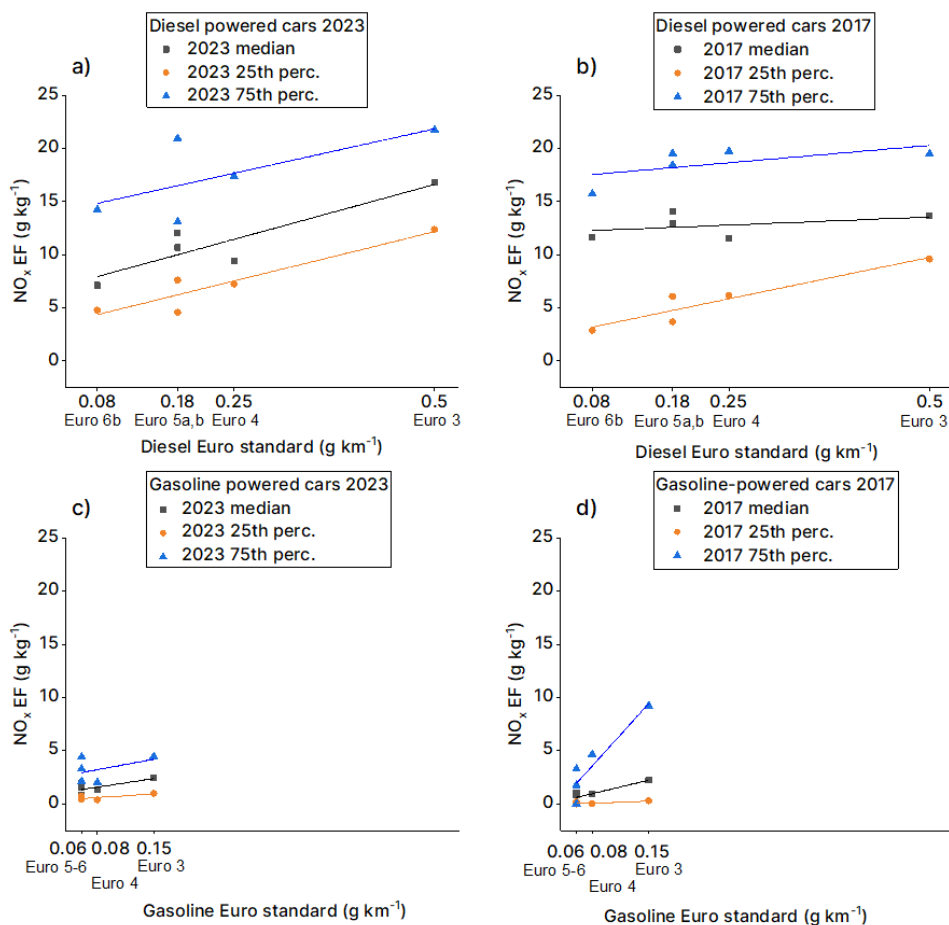

| Diesel         | 2023 median  | 2023 25th perc. | 2023 75th perc. | 2017 median  | 2017 25th perc. | 2017 75th perc. |
|----------------|--------------|-----------------|-----------------|--------------|-----------------|-----------------|
| R-Square (COD) | 0.82         | 0.88            | 0.47            | 0.18         | 0.88            | 0.38            |
| Intercept      | 6.30 ± 1.55  | 2.89 ± 1.12     | 13.49 ± 2.84    | 12.02 ± 1.04 | 1.95 ± 0.90     | 17.02 ± 1.32    |
| Slope          | 20.60 ± 5.61 | 18.57 ± 4.04    | 16.67 ± 10.24   | 3.05 ± 3.74  | 6.49 ± 4.78     | 6.49 ± 4.78     |
| Prob>F         | 0.035        | 0.019           | 0.202           | 0.475        | 0.017           | 0.267           |
| Gasoline       | 2023 median  | 2023 25th perc. | 2023 75th perc. | 2017 median  | 2017 25th perc. | 2017 75th perc. |
| R-Square (COD) | 0.56         | 0.58            | 0.21            | 0.76         | 0.56            | 0.86            |
| Intercept      | 0.66 ± 0.53  | 0.23 ± 0.21     | 2.10 ± 1.38     | -0.47 ± 0.52 | -0.10 ± 0.11    | -3.05 ± 1.72    |
| Slope          | 11.54 ± 5.94 | 4.69 ± 2.33     | 13.97 ± 15.51   | 18.02 ± 5.79 | 83.23 ± 19.27   | 83.23 ± 19.27   |
| Prob>F         | 0.147        | 0.137           | 0.434           | 0.053        | 0.148           | 0.023           |

Figure 3 NO<sub>x</sub> EF median (black squares), 25<sup>th</sup> (orange circles), and 75<sup>th</sup> percentiles (blue triangles) against the NO<sub>x</sub> legislation standards. The top row shows the results for diesel-powered cars in the 2023 campaign (a) and 2017 campaign (b). The bottom row shows the results for gasoline-powered cars in the 2023 campaign (c) and 2017 campaign (d). The lines in coordinating colors are the linear regression lines with their parameters (R-square, intercept, slope, and Prob> F, where  $\alpha = 5\%$ ) are listed in the table below.

These results suggest an improvement in a quarter of diesel cars' NO<sub>x</sub> emissions, with vehicles achieving lower emissions in successive standards, as indicated by lowering 25<sup>th</sup> percentiles in both campaigns. However, there was no significant change in the 75<sup>th</sup> percentile, implying that a quarter of vehicles remained unaffected by stricter legislation. In 2017, median values for diesel cars didn't change significantly with legislation, while in 2023, median values for diesel cars correlated with legislative changes. This discrepancy between the two campaigns may be the effect of the recall of 8.5 million cars in Europe, which reached 79.7% by July 2018, by the Volkswagen group.

While our goods vehicles sample size was relatively small in the 2023 campaign and most of the captured vehicles were compliant with Euro VI, we can see from both the 2017 and 2023 campaigns the decrease in NO<sub>x</sub> and BC emissions, as both drop to the level of cars NO<sub>x</sub> EFs. The results from the 2017 campaign, Euro V, Euro IV, and older (median of all ~ 20 g kg<sup>-1</sup>, average ~ 24 g kg<sup>-1</sup>) match the results from Yang et al. (2025) China V vehicles (19.8 – 23.2 g kg<sup>-1</sup>). Still, our Euro VI NO<sub>x</sub> EF (median in 2023 and 2017 campaigns were 2.4 and 4.05 g kg<sup>-1</sup>, respectively, and averages 7.76 and 10.73 g kg<sup>-1</sup>, respectively) are lower than China VI reported by Yang et al (2025), which were 14.1 and 17.4 g kg<sup>-1</sup> for medium and heavy-duty trucks, respectively.

### 3.3. Super-emitter Contribution

Lorenz curves are used to assess the impact of so-called super-emitters. The curves show the proportion of total emissions (y-axis) produced cumulatively by the bottom x% of the fleet, ranking vehicles from least to most polluting. A straight line between the origin (no emissions) and maximum emissions on a 1:1 scale (and hence the line at 45°) would indicate equal pollution contribution by all vehicles. To compare these lines between the three campaigns, we calculated the Gini index, which represents the ratio between the area between the Lorenz curve and the perfect equality line at 45° and the entire area under the perfect equality line. We analyzed each campaign, vehicle group, and each pollutant separately. Figure 4 reveals that super-emitters' contribution is more skewed for BC emissions (a, b, c) than NO<sub>x</sub> emissions (d, e, f), as demonstrated by generally higher Gini indexes closer to 1. The curves become typically more skewed over the three campaigns, as shown by generally increasing Gini indexes, a small fraction of vehicles contribute more pollution than most vehicles. A Gini index closer to 0 would indicate that all vehicles in the group contribute the same to total fleet emissions.

The top 10% of gasoline-powered car emitters with the highest BC EF contributed 21%, 44%, and 47% of total gasoline car fleet BC emissions in 2011, 2017, and 2023, respectively (Figure 4 a). The top 10% of diesel cars with the highest BC EF contributed 36%, 51%, and 65% of total diesel car fleet BC emissions in the same years (Figure 4b). For goods vehicles, the top 10% contributed 53%, 43%, and 48% of total BC emissions in 2011, 2017, and 2023, respectively (Figure 4c).

In terms of NO<sub>x</sub> emissions, the top 10% of gasoline-powered cars contributed 31%, 59%, and 44% of total gasoline car fleet NO<sub>x</sub> emissions in 2011, 2017, and 2023, respectively (Figure 4 d). For diesel-powered cars, the top 10% contributed 22%, 28%, and 29% of total NO<sub>x</sub> emissions in the same years (Figure 4 e). The top 10% of goods vehicles contributed 22%, 30%, and 41% of total goods vehicles' fleet NO<sub>x</sub> emissions in 2011, 2017, and 2023, respectively (Figure 4 f). The contribution is

increasing over the campaigns, which means that by lowering EF in general, the super emitters are even more important if we want to further improve the air quality in the cities.

325 Excluding vehicles that disproportionately contribute to total fleet emissions from city access would be a more effective measure to reduce traffic emissions than excluding vehicles based on specific emission standards (Ježek et al., 2018). This approach would also notify and incentivize vehicle owners to maintain their vehicles better.

To prepare an effective strategy to reduce overall pollution in a city, the focus should be on targeting the highest-emitting vehicles, regardless of whether they are diesel or gasoline-powered. The Gini index analysis showed that equal contribution to emissions does not necessarily mean the emissions are good or desirable – as is shown on Figure 4 diesel cars with a more uniform  $\text{NO}_x$  emissions profile had problematic overall  $\text{NO}_x$  levels.  
330

However, to find vehicles that may be using defeat devices, a more granular analysis of different vehicle groups would be beneficial. The Lorenz curves could be used as a monitoring tool to identify outliers within specific vehicle categories, as those could indicate cars with malfunctioning emissions control systems or illegal tampering.

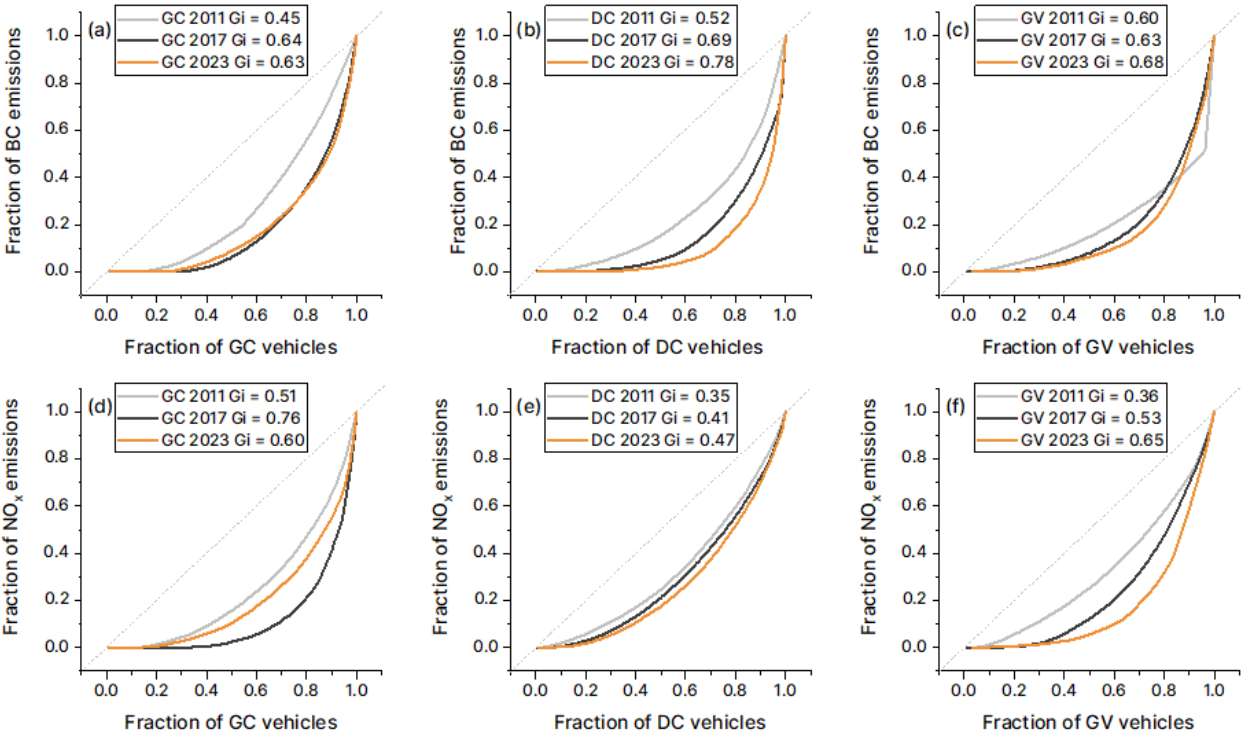

335 **Figure 4** Super emitter curves are presented as Lorenz curves, where we distribute vehicles within each group from least to most polluting and sum their emissions; and Gini indexes (Gi). We did this separately for Gasoline Cars (GC), Diesel Cars (GC), and Goods vehicles (GV), and compared their results in the 2023 (orange), 2017 (black), and 2011 (gray) campaigns.

#### 4. Discussion

340 Ježek et al. (2015a), found good consistency between the results of different calculation approaches to chasing data and between results of various study types, including remote sensing, chasing, mobile measurements, and the European Environmental Agency's emission inventory. This further demonstrates the consistency and reliability of the measurement methods used in these studies. In recent years, new methodologies and dedicated instrumentation have been developed (Farren et al., 2023; Olin et al., 2023), with increased interest in determining the most robust independent methodology for screening  
345 many vehicles for defeat devices (Ellermann et al., 2018; Janssen and Hagberg, 2018).

One significant challenge in measuring vehicle emissions in real-world conditions is the high variability in vehicle operation, which affects emissions. Considerable effort has been made to enhance the robustness and repeatability of on-road measurements using PEMS. The procedures for RDE testing with PEMS are summarized in the Joint Research Centre's Report (Valverde Morales and Bonnel, 2018). This report guides the preparation, execution, and data quality checks for emissions  
350 tests with PEMS on light-duty vehicles, following EU legislation. Additionally, (Zardini and Bonnel, 2020) present a detailed analysis of 79 tests conducted on 11 passenger cars, summarizing the latest EU-RDE procedure (RDE-4, Regulation EU 2018/1832). They emphasize the responses provided by the RDE data analysis tool, EMROAD version 6.03, developed and maintained by the Joint Research Center.

The data collection includes RDE tests designed to cover a broad range of environmental conditions (e.g., temperature and  
355 altitude) and to challenge the trip dynamics requirements defined by legislation to represent typical vehicle use. The EMROAD tool evaluates trip validity based on factors such as trip duration, distance, distance shares in specific driving regimes (e.g., urban), vehicle speed and speed shares, trip dynamics, ambient conditions, elevation gain, trip severity relative to the WLTP driving cycle (based on CO<sub>2</sub>), and emissions of pollutants, along with their correction for ambient boundary conditions and excess severity. For better understanding and comparison, it would be useful to make such detailed assessments also with the  
360 chasing method.

PEMS measurements typically last about 90 minutes per vehicle, whereas our chasing measurements averaged 90 seconds per vehicle in the 2017 and 2023 campaigns. Given the limited parameters controlled with the chasing method, further investigation is warranted. However, studies suggest it can be a useful screening tool (Farren et al., 2023; Vojtisek-Lom et al., 2020).

#### 5. Conclusions

365 Our analysis of three separate campaigns conducted in 2011, 2017, and 2023 demonstrates that the chasing method results are consistent over time and the method can be used to determine the BC and NO<sub>x</sub> EF in real driving conditions.

We have observed significant improvements in the BC EF of diesel-powered cars following the installation of DPF. Furthermore, with the introduction of SCR and stricter regulations, manufacturers have drastically reduced the NO<sub>x</sub> emissions of diesel-powered cars, bringing them down to levels comparable to those of gasoline-powered cars. Similar results were  
370 obtained for goods vehicles.



Our results show that the measures to reduce vehicle emissions with increasingly stricter vehicle emissions standards were reflected to some extent in the lower values of the real-world driving EF, regardless of the high variability in vehicle maintenance, environmental conditions, driving accelerations, and speeds. The effectiveness of DPF was reflected in most of the fleet, since the 75<sup>th</sup> percentile of Euro 5b was reduced to below the 25<sup>th</sup> percentile of Euro 4, reducing the median by 88%.

375 The NO<sub>x</sub> EF showed a gradual decrease in the cleanest 25% of the vehicles, while the highest emitters' NO<sub>x</sub> EF remained stable until RDE tests were introduced with Euro 6c, when the NO<sub>x</sub> EF median was reduced by 86% compared to pre-RDE Euro 6b. Despite significant technological advancements, such as the installation of DPFs and the introduction of SCR systems that have drastically reduced the NO<sub>x</sub> emissions of diesel-powered cars and goods vehicles to levels comparable to gasoline vehicles, a small fraction of high-polluting vehicles is now the primary obstacle to substantially reducing traffic-related emissions. As demonstrated in Ježek et al. (2018), excluding high-emitting vehicles is a more efficient strategy to reduce traffic emissions than excluding vehicles based on older emission standards, since some super emitters are newer vehicles. With the 380 three major vehicle groups BC and NO<sub>x</sub> EF now being nearly the same, targeting the highest-emitting vehicles, whether they are diesel or gasoline-powered, should be the focus of any effective pollution reduction strategy.

We showed how Lorentz curves for BC emissions became more skewed, with 10% of diesel cars with the highest BC EF 385 contributing 36%, 51%, and 65% of total diesel cars' emissions in 2011, 2017, and 2023, respectively. The contributions of these high emitters remained more similar for NO<sub>x</sub> emissions, with the top 10% of the most polluting diesel-powered cars contributing 22%, 28%, and 29% of total NO<sub>x</sub> emissions in the same years. Due to the success of RDE tests in lowering diesel vehicles NO<sub>x</sub> EF, we expect that Lorenz curves for NO<sub>x</sub> emissions will also become more skewed in the future as most of the older cars are eliminated from the fleet.

390 A robust method for measuring vehicle emissions in real driving conditions, as suggested by our work, would be a valuable tool for monitoring vehicle emissions independently of the vehicle driver or owner's knowledge, thereby bypassing any potential interference from manufacturers and vehicle owners who may be using defeat devices or failing to properly maintain their vehicles.

Additionally, a comprehensive measurement base would facilitate the development of more accurate models for forecasting 395 traffic emissions. It would also enhance the efficiency of measures implemented by cities to reduce traffic pollution and provide a means to monitor and evaluate their effectiveness. This comprehensive data collection could guide policymakers in making informed decisions and implementing effective strategies to mitigate urban air pollution.

By combining the insights from the Gini index and Lorenz curve analyses, policymakers can identify the highest-emitting vehicles regardless of fuel type, while also using real-world emissions monitoring to detect vehicles with malfunctioning or 400 tampered emissions control systems. This holistic approach, focused on the actual emissions performance rather than just the vehicle technology, is essential for developing comprehensive policies to significantly improve air quality in cities.

**Author contribution:** IJB, AG, MR, and GM designed the experiments. IJB, LZ, and TR carried them out, and MI and BA provided technical assistance. IJB, LZ, TR, and MI performed the data analysis. GM and AG acquired funds for the projects.

405 MR, AG, IJB, and GM supervised the projects. IJB wrote the initial draft. All authors discussed the results and contributed to the final manuscript.

**Acknowledgements:**

This work was partly financed by the European Regional Fund (MECEDES) and the Slovenian Research and Innovation Agency research project L1-4386 (CAEmissionMonitor) and program P1-0385 ([Remote sensing of atmospheric properties](#)).  
410 We acknowledge the funding contribution of the EU Horizon Europe project MI-TRAP (grant 101138449). Thanks to the Slovenian Ministry of Infrastructure and Spatial Planning for providing the registration information. AI was used for language editing.

**Conflict of interests:**

The authors IJB, AG, MI, BA, GM, and MR were employed by Aerosol d.o.o., the manufacturer of Aethalometers, at the time  
415 or part of the time while the study was conducted.

**Data availability:**

Due to the Personal Data Protection Act (Slovenia) and GDPR (EU), the distribution of the dataset is limited, parts may be available upon request.

420 **References**

The European Parliament: Directive EU 2024/2881, 2024.

Bernard, Y., Dallmann, T., Lee, K., Rintanen, I., and Tietge, U.: Evaluation of real-world vehicle emissions in Brussels, 2021.

Bond, T. C., Doherty, S. J., Fahey, D. W., Forster, P. M., Berntsen, T., DeAngelo, B. J., Flanner, M. G., Ghan, S., Kärcher, B., Koch, D., Kinne, S., Kondo, Y., Quinn, P. K., Sarofim, M. C., Schultz, M. G., Schulz, M., Venkataraman, C., Zhang, H.,  
425 Zhang, S., Bellouin, N., Guttikunda, S. K., Hopke, P. K., Jacobson, M. Z., Kaiser, J. W., Klimont, Z., Lohmann, U., Schwarz, J. P., Shindell, D., Storelvmo, T., Warren, S. G., and Zender, C. S.: Bounding the role of black carbon in the climate system: A scientific assessment, *Journal of Geophysical Research: Atmospheres*, 118, 5380–5552, <https://doi.org/10.1002/jgrd.50171>, 2013.

Carslaw, D. C., Farren, N. J., Vaughan, A. R., Drysdale, W. S., Young, S., and Lee, J. D.: The diminishing importance of  
430 nitrogen dioxide emissions from road vehicle exhaust, *Atmos Environ X*, 1, 100002, <https://doi.org/10.1016/J.AEAOA.2018.100002>, 2019.

- Chen, Y., Sun, R., and Borken-Kleefeld, J.: On-Road NO<sub>x</sub> and Smoke Emissions of Diesel Light Commercial Vehicles-Combining Remote Sensing Measurements from across Europe, *Environ Sci Technol*, 54, 11744–11752, [https://doi.org/10.1021/ACS.EST.9B07856/SUPPL\\_FILE/ES9B07856\\_SI\\_001.PDF](https://doi.org/10.1021/ACS.EST.9B07856/SUPPL_FILE/ES9B07856_SI_001.PDF), 2020.
- 435 Court of Justice of the European Union: Press release No 170/20, 2020.
- Dallmann, T. R., Harley, R. A., and Kirchstetter, T. W.: Effects of diesel particle filter retrofits and accelerated fleet turnover on drayage truck emissions at the port of Oakland, *Environ Sci Technol*, 45, 10773–10779, 2011.
- Dallmann, T. R., Demartini, S. J., Kirchstetter, T. W., Herndon, S. C., Onasch, T. B., Wood, E. C., and Harley, R. A.: On-road measurement of gas and particle phase pollutant emission factors for individual heavy-duty diesel trucks, *Environ Sci Technol*,  
 440 46, 8511–8518, 2012.
- Economic Commission for Europe of the United Nations: Regulation No 83 UN/ECE, 2011.
- Ellermann, T., Hertel, O., Winther, M., Risager Nielsen, J., and Rud Ingvarsdén, C.: Measurements of cheating with SCR catalysts on heavy duty vehicles, Danish Environmental Protection Agency, 2018.
- Consumer rights and complaints - Coordinated actions - Dieselgate: [https://commission.europa.eu/live-work-travel-eu/consumer-rights-and-complaints/enforcement-consumer-protection/coordinated-actions/dieselgate\\_en](https://commission.europa.eu/live-work-travel-eu/consumer-rights-and-complaints/enforcement-consumer-protection/coordinated-actions/dieselgate_en), last access: 20  
 445 September 2024.
- Farren, N. J., Schmidt, C., Juchem, H., Pöhler, D., Wilde, S. E., Wagner, R. L., Wilson, S., Shaw, M. D., and Carslaw, D. C.: Emission ratio determination from road vehicles using a range of remote emission sensing techniques, *Science of the Total Environment*, 875, <https://doi.org/10.1016/j.scitotenv.2023.162621>, 2023.
- 450 Giechaskiel, B., Forloni, F., Carriero, M., Baldini, G., Castellano, P., Vermeulen, R., Kontses, D., Fragkiadoulakis, P., Samaras, Z., and Fontaras, G.: Effect of Tampering on On-Road and Off-Road Diesel Vehicle Emissions, *Sustainability* (Switzerland), 14, <https://doi.org/10.3390/su14106065>, 2022.
- González Ortiz, A., Guerreiro, C., Soares, J., Antognazza, F., Gsell, A., Houssiau, M., Liberti, L., Lükewille, A., Öztürk, E., Horálek, J., Banyuls, L., TargaJaume, Solberg, S., Schneider, P., Walker, S.-E., Rouil, L., Raux, B., Peuch, V.-H., and Barré,  
 455 J.: Air quality in Europe - 2020 report, <https://doi.org/doi:10.2800/786656>, 2020.
- Grange, S. K., Farren, N. J., Vaughan, A. R., Rose, R. A., and Carslaw, D. C.: Strong Temperature Dependence for Light-Duty Diesel Vehicle NO<sub>x</sub> Emissions, *Environ Sci Technol*, 53, 6587–6596, [https://doi.org/10.1021/ACS.EST.9B01024/ASSET/IMAGES/LARGE/ES-2019-01024G\\_0006.JPEG](https://doi.org/10.1021/ACS.EST.9B01024/ASSET/IMAGES/LARGE/ES-2019-01024G_0006.JPEG), 2019.
- Hansen, A. D. A. and Rosen, H.: Individual Measurements of the Emission Factor of Aerosol Black Carbon in Automobile  
 460 plumes, *Journal of Air Waste Management Association*, 40, 1654–1657, 1990.
- Huss, A., Mass, H., and Hass, H.: WELL-TO-WHEELS ANALYSIS OF FUTURE AUTOMOTIVE FUELS AND POWERTRAINS IN THE EUROPEAN CONTEXT, <https://doi.org/10.2788/40409>, 2013.
- Janssen, J. and Hagberg, N.: Plume Chasing A way to detect high NO<sub>x</sub> emitting vehicles, Haninge, 2018.
- Janssen, N. A. H., Gerlof-Nijland, M. E., Lanki, T., O, S. R., Cassee, F., Gerard, H., Fischer, P., Brunekreef, B., and  
 465 Krzyzanowski, M.: Health effects of Black Carbon, WHO Regional Office for Europe, Bonn, 2012.

- Ježek, I., Katrašnik, T., Westerdahl, D., and Mocnik, G.: Black carbon, particle number concentration and nitrogen oxide emission factors of random in-use vehicles measured with the on-road chasing method, *Atmos Chem Phys*, 15, <https://doi.org/10.5194/acp-15-11011-2015>, 2015a.
- 470 Ježek, I., Drinovec, L., Ferrero, L., Carriero, M., and Močnik, G.: Determination of car on-road black carbon and particle number emission factors and comparison between mobile and stationary measurements, *Atmos Meas Tech*, 8, <https://doi.org/10.5194/amt-8-43-2015>, 2015b.
- Ježek, I., Blond, N., Skupinski, G., and Močnik, G.: The traffic emission-dispersion model for a Central-European city agrees with measured black carbon apportioned to traffic, *Atmos Environ*, 184, <https://doi.org/10.1016/j.atmosenv.2018.04.028>, 2018.
- 475 Landis, M., Lewis, C., and Stevens, R.: Ft. McHenry tunnel study: Source profiles and mercury emissions from diesel and gasoline powered vehicles, *Atmos Environ*, 41, 8711–8724, <https://doi.org/10.1016/j.atmosenv.2007.07.028>, 2007.
- Meyer, M., Bernard, Y., German, J., and Dallmann, T.: Reassessment Of Excess NO<sub>x</sub> From European Diesel Cars Following The Court Of Justice Of The European Union Rulings, Washington, 2023.
- Olin, M., Oikarinen, H., Marjanen, P., Mikkonen, S., and Karjalainen, P.: High Particle Number Emissions Determined with Robust Regression Plume Analysis (RRPA) from Hundreds of Vehicle Chases, *Environ Sci Technol*, 57, <https://doi.org/10.1021/acs.est.2c08198>, 2023.
- 480 Petzold, A., Ogren, J. A., Fiebig, M., Laj, P., Li, S. M., Baltensperger, U., Holzer-Popp, T., Kinne, S., Pappalardo, G., Sugimoto, N., Wehrli, C., Wiedensohler, A., and Zhang, X. Y.: Recommendations for reporting black carbon measurements, *Atmos Chem Phys*, 13, 8365–8379, <https://doi.org/10.5194/acp-13-8365-2013>, 2013.
- 485 Posada Sanchez, F., Bandivadekar, A., and German, J.: Estimated Cost of Emission Reduction Technologies for Light-Duty Vehicles, Washington, 2012.
- The Commission of the European Communities: Directive - 2001/116, 2001.
- The European Commission: Regulation - 459/2012, 2012.
- The European Commission: Regulation - 2016/646, 2016.
- 490 The European Commission: Regulation - 2017/1151, 2017.
- USEPA: Code federal regulations - Title 40: Protection of environment Part 86, 2010.
- Valverde Morales, V. and Bonnel, P.: On-road testing with Portable Emissions Measurement Systems (PEMS). Guidance note for light-duty vehicles., <https://doi.org/10.2760/08294>, 2018.
- Vojtisek-Lom, M., Arul Raj, A. F., Jindra, P., Macoun, D., and Pechout, M.: On-road detection of trucks with high NO<sub>x</sub> emissions from a patrol vehicle with on-board FTIR analyzer, *Science of the Total Environment*, 738, <https://doi.org/10.1016/j.scitotenv.2020.139753>, 2020.
- Wang, H., Zhang, S., Wu, X., Wen, Y., Li, Z., and Wu, Y.: Emission Measurements on a Large Sample of Heavy-Duty Diesel Trucks in China by Using Mobile Plume Chasing, *Environ Sci Technol*, 57, 15153–15161, [https://doi.org/10.1021/ACS.EST.3C03028/SUPPL\\_FILE/ES3C03028\\_SI\\_001.PDF](https://doi.org/10.1021/ACS.EST.3C03028/SUPPL_FILE/ES3C03028_SI_001.PDF), 2023.

- 500 Wang, J. M., Jeong, C.-H., Zimmerman, N., Healy, R. M., Wang, D. K., Ke, F., and Evans, G. J.: Plume-based analysis of vehicle fleet air pollutant emissions and the contribution from high emitters, *Atmospheric Measurement Techniques Discussions*, 8, 2881–2912, <https://doi.org/10.5194/amtd-8-2881-2015>, 2015.
- Wang, X., Westerdahl, D., Wu, Y., Pan, X., and Zhang, K. M.: On-road emission factor distributions of individual diesel vehicles in and around Beijing , China, *Atmos Environ*, 45, <https://doi.org/10.1016/j.atmosenv.2010.09.014>, 2011.
- 505 Wang, X., Westerdahl, D., Hu, J., Wu, Y., Yin, H., Pan, X., and Zhang, K. M.: On-road diesel vehicle emission factors for nitrogen oxides and black carbon in two Chinese cities, *Atmos Environ*, 46, 45–55, <https://doi.org/10.1016/j.atmosenv.2011.10.033>, 2012.
- Yang, J., Che, X., Tan, J., Qin, X., Duan, J., Liu, D., Duan, Y., Xiang, S., Shen, N., Zhai, X., Zhang, Y., Ning, Z., and Li, L.: Real-world emission characteristics and driving factors of diesel trucks: Insights from plume chasing experiments, *Atmos Environ X*, 25, 100311, <https://doi.org/10.1016/J.AEAOA.2025.100311>, 2025.
- 510 Yang, P., Wang, H., Wu, X., Xiao, S., Zheng, X., You, Y., Zhang, S., and Wu, Y.: Long-term plume-chasing measurements: Emission characteristics and spatial patterns of heavy-duty trucks in a megacity, *Environmental Pollution*, 361, <https://doi.org/10.1016/J.ENVPOL.2024.124819>, 2024.
- Zardini, A. and Bonnel, P.: Real Driving Emissions Regulation : European methodology to fine tune the EU real driving emissions data evaluation method., <https://doi.org/10.2760/176284>, 2020.
- 515 Zeng, L., Xiao, S., Dai, Y., Chen, T., Wang, H., Yang, P., Huang, G., Yan, M., You, Y., Zheng, X., Zhang, S., and Wu, Y.: Characterization of on-road nitrogen oxides and black carbon emissions from high emitters of heavy-duty diesel vehicles in China, *J Hazard Mater*, 477, 135225, <https://doi.org/10.1016/J.JHAZMAT.2024.135225>, 2024.
